# Supplementary material for: Superhydrophobic hemostatic nanofiber composites for fast clotting and minimal adhesion
Source: PubMed Central journal article supplement (PMC6895059; doi:10.1038/s41467-019-13512-8), 2019-12-05
Supplement: 41467_2019_13512_MOESM10_ESM.pdf [file 41467_2019_13512_MOESM10_ESM.pdf]

**Title:** Supplementary Movie 1:

**Description:** On the superhydrophobic CNF/PTFE Ti flat surface, fibrin fibers are forming at the receding side of a 20  $\mu$ l platelet poor plasma (PPP) droplet with anti-coagulant EDTA. This movie also reveals the importance of proper illumination for visualizing the fibrin fibers at the receding side (at time: 2 seconds, in the Movie). Fibrin fiber footprints are visible on the surface, after catastrophic fiber fracture and droplet rolling down.

**Title:** Supplementary Movie 2:

**Description:** On the superhydrophobic CNF/PTFE Ti flat surface, fibrin fibers are forming at the receding side of a 20  $\mu$ l blood droplet with anti-coagulant EDTA.

**Title:** Supplementary Movie 3:

**Description:** On the superhydrophobic CNF/PTFE Ti mesh surface, abundant fibrin fibers are generating at the receding side of a blood droplet with anti-coagulant 3.8% sodium citrate.

**Title:** Supplementary Movie 4:

**Description:** On the superhydrophobic CNF/PDMS Ti flat surface, fibrin fibers are forming at the receding side of a 20  $\mu$ l PPP droplet with anti-coagulant EDTA.

**Title:** Supplementary Movie 5:

**Description:** On the superhydrophobic CNF/PDMS Ti flat surface, fibrin fibers are forming at the receding side of a 20  $\mu$ l blood droplet with anti-coagulant 3.8% sodium citrate.

**Title:** Supplementary Movie 6:

**Description:** The superhydrophobic CNF gauze (applied on the wound for about 2 hours) can be easily peeled off, without tearing the wound.

**Title:** Supplementary Movie 7:

**Description:** There is a strong adhesion between the normal gauze and the wound. Peeling the normal gauze at about 2 hours seriously tore the wound, and caused secondary bleeding.
